# Supplementary material
Source: PubMed Central journal article supplement (PMC2605993)
Supplement: M807377200_1.pdf [file M807377200_1.pdf]

Supplementary figures

A

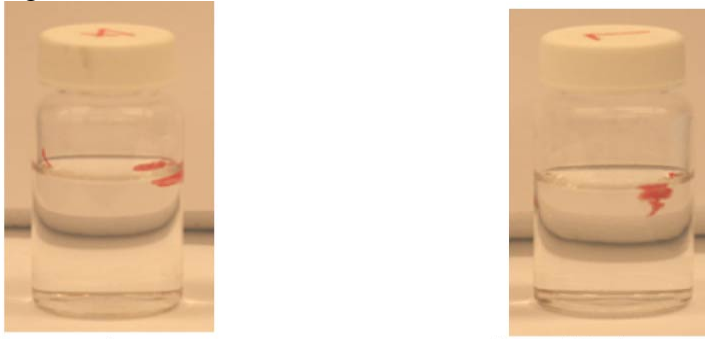

B

*Abca12* +/+

*Abca12* -/-

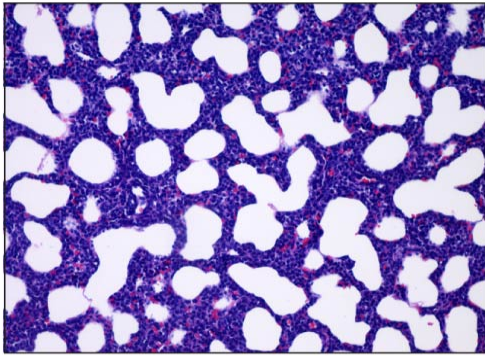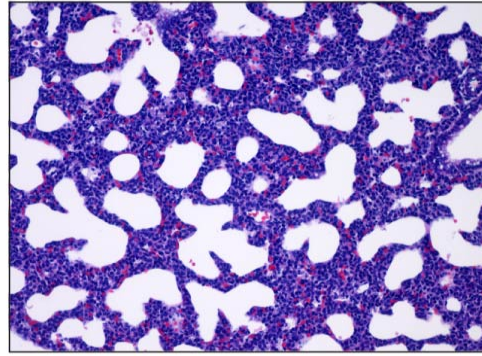

C

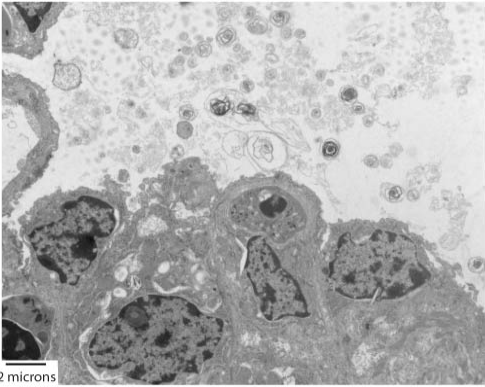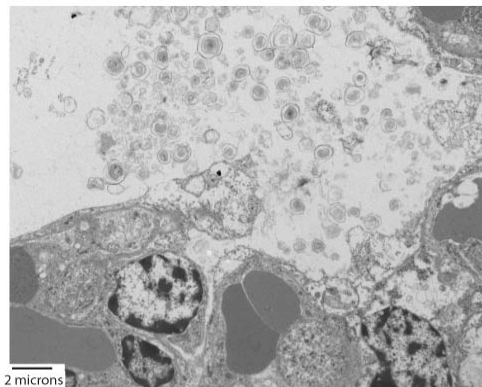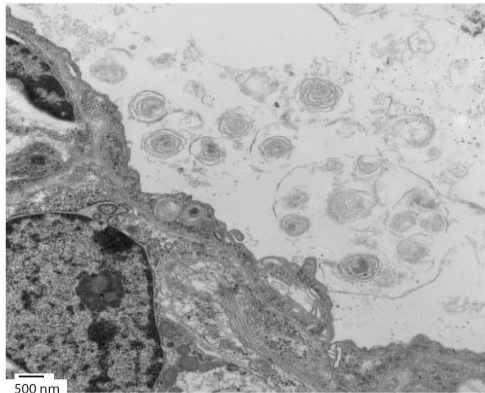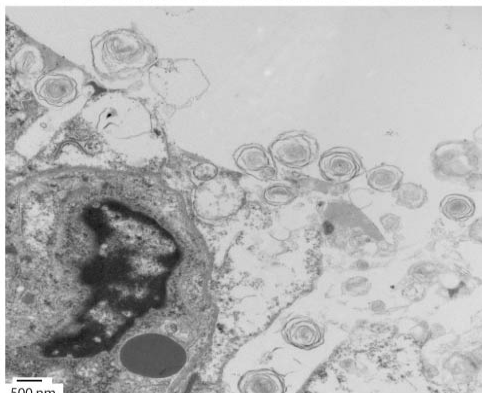

**Abca12<sup>-/-</sup> P0 pups are able to inflate their lungs if maintained in a hydrating environment.** (A) *Abca12<sup>-/-</sup>* P0 lungs float in 1 X PBS indicating an ability to inflate the lung. (B) Histological sections of *Abca12<sup>-/-</sup>* lung shows inflated alveoli relative to the corresponding littermate *Abca12<sup>+/+</sup>* lungs. (C) Electron micrographs of the *Abca12<sup>-/-</sup>* lungs demonstrate type II alveolar cells form lamellar bodies and secrete surfactant.

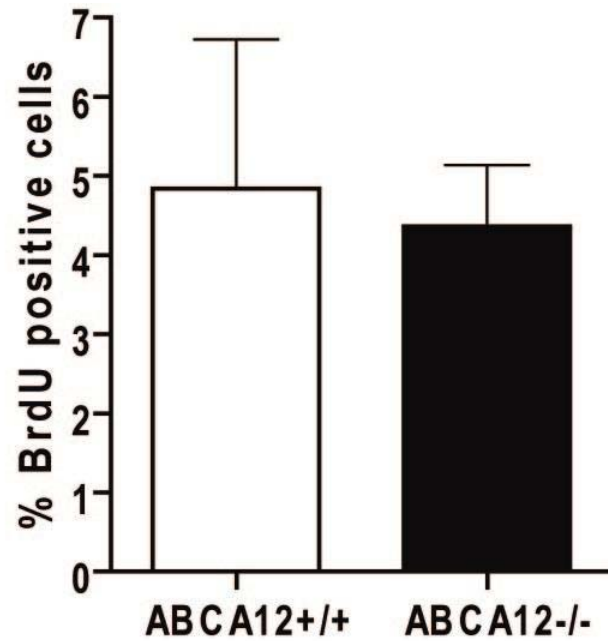

**Supplemental Figure 2**

***Loss of ABCA12 transport function does not increase DNA synthesis in the E18.5 epidermis.*** Graphed is the percent of epidermal area occupied by BrdU positive cells quantified by automated image analysis of BrdU immunostained sections from littermate E18.5 embryos labeled *in utero* with BrdU for one hour (*Abca12*<sup>+/+</sup>, n=3, *Abca12*<sup>-/-</sup>, n=4, ± SD, P= 0.81)

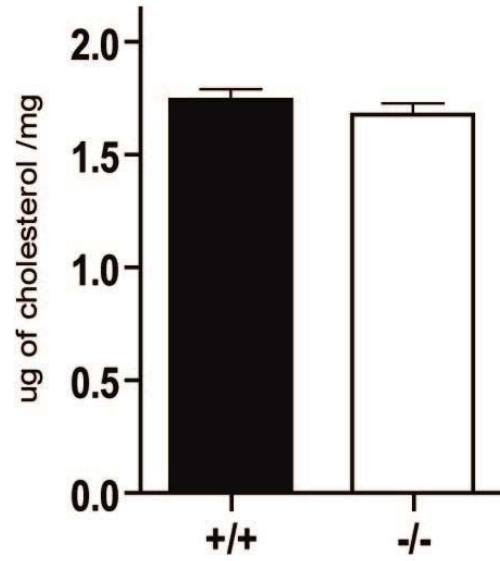

**Supplemental Figure 3**

*Loss of ABCA12 does not affect skin total cholesterol levels.* Graphed are micrograms of total cholesterol per milligram present in the skin of littermate paired E18.5 embryos (n=5,  $\pm$ SD, P=0.51)

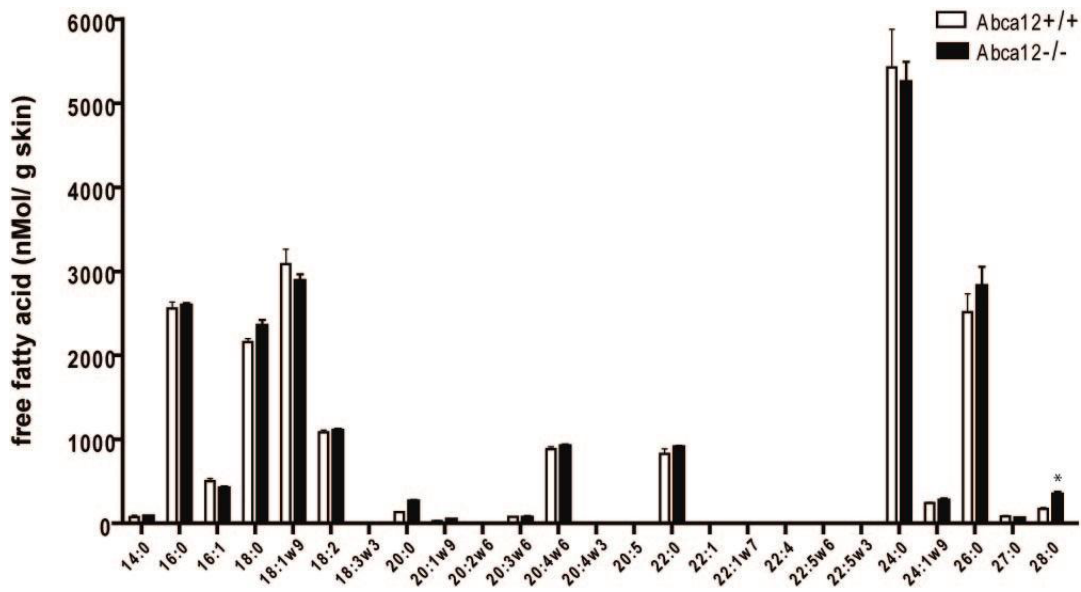

**Supplemental Figure 4**

*Loss of ABCA12 does not significantly alter the levels of the major skin free fatty acids, including linoleic acid (18:2).* Graphed are the amounts of the major free fatty acids detected by GC-MS in the skin of littermate paired E18.5 embryos (n=5,  $\pm$  SD, \*p<0.05).

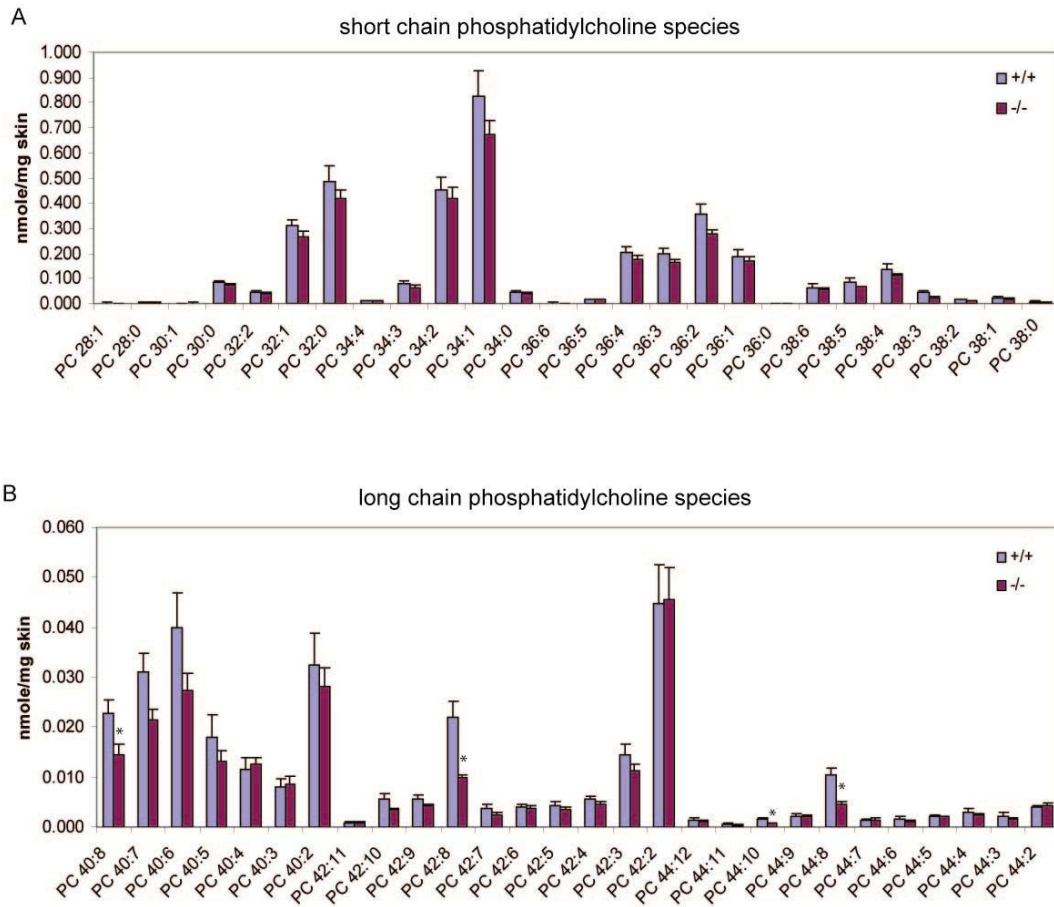

### Supplemental Figure 5

**Levels of short chain phosphatidylcholine species (A) and long chain PC species (B) in the skin of E18.5 littermate paired *Abca12*<sup>+/+</sup> and *Abca12*<sup>-/-</sup> embryos.** Graphed are the nmol of PC per mg of skin (n=5,  $\pm$  SEM, \*p<0.05).

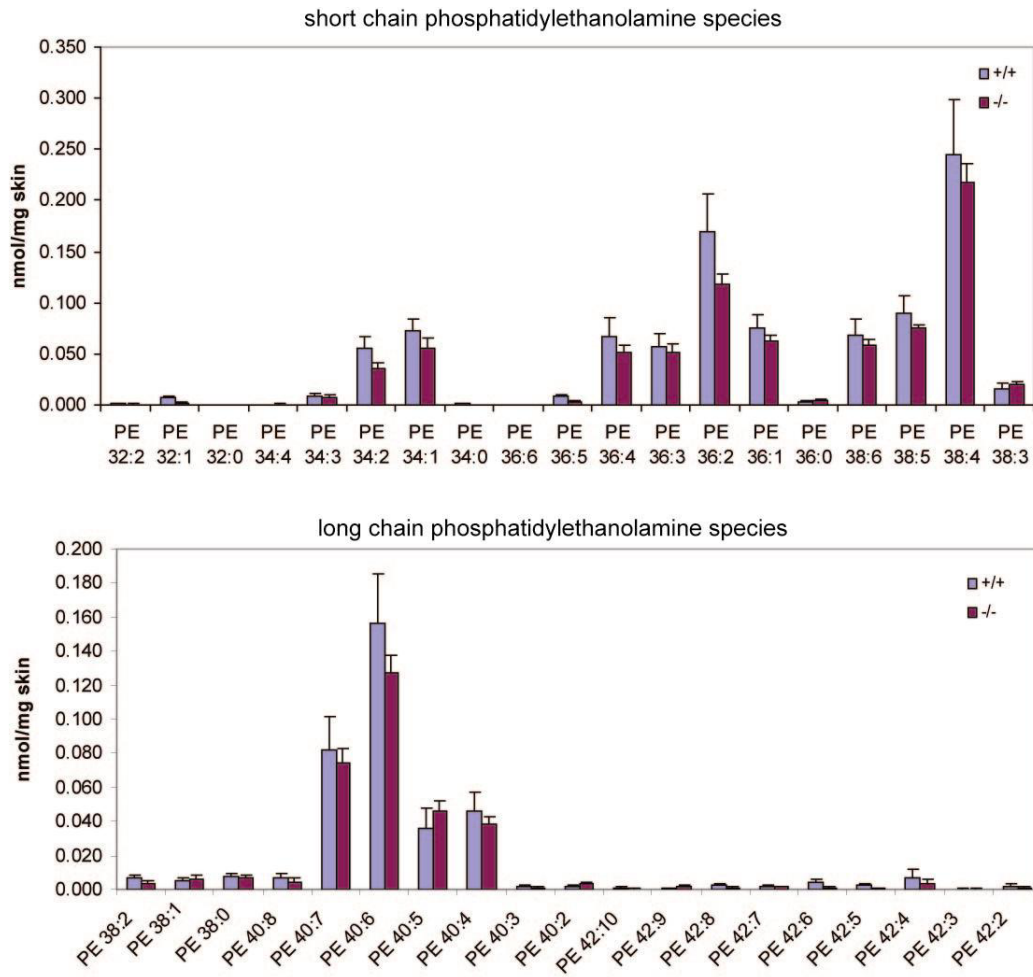

**Supplemental Figure 6**

***Analysis of phosphatidylethanolamine levels in the  $Abca12^{-/-}$  mice.*** Graphed are the nmol of PE per mg of skin of littermate paired E18.5  $Abca12^{+/+}$  and  $Abca12^{-/-}$  embryos (n=5,  $\pm$  SEM, no significant differences).

phosphatidylserine in *Abca12*<sup>-/-</sup> skin

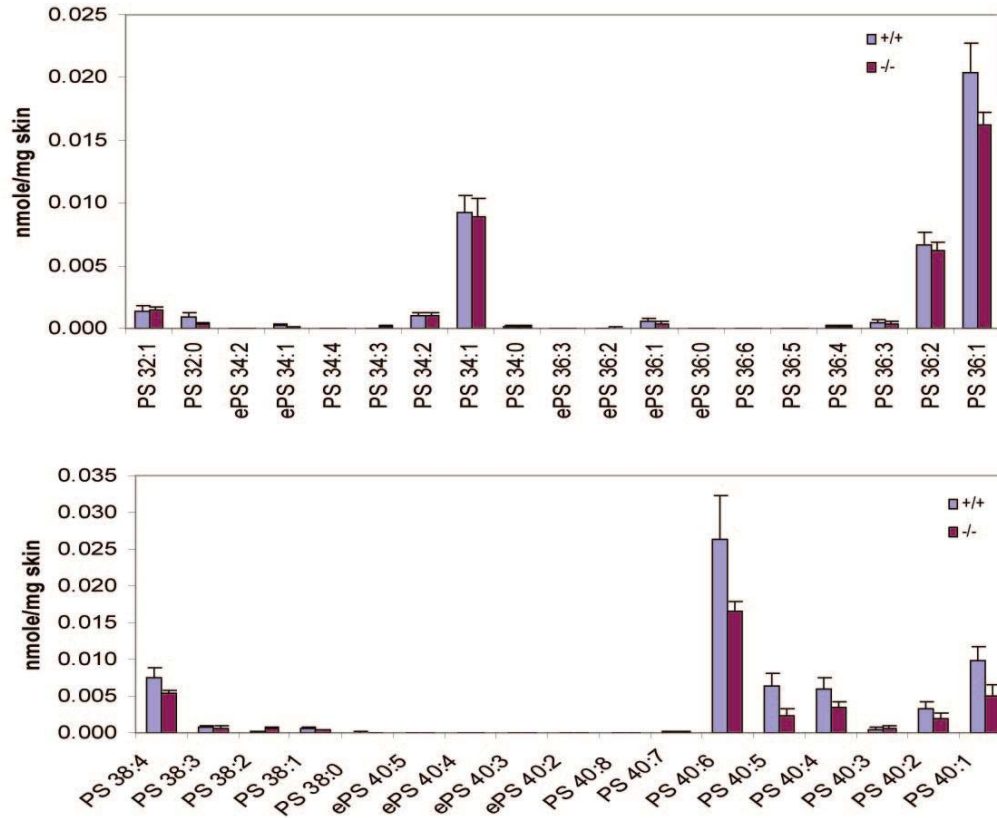

**Supplemental Figure 7**

***Analysis of phosphatidylserine levels in the *Abca12*<sup>-/-</sup> mice.*** Graphed are the nmol of PS per mg of skin of littermate paired E18.5 *Abca12*<sup>+/+</sup> and *Abca12*<sup>-/-</sup> embryos (n=5, ± SEM, no significant differences).

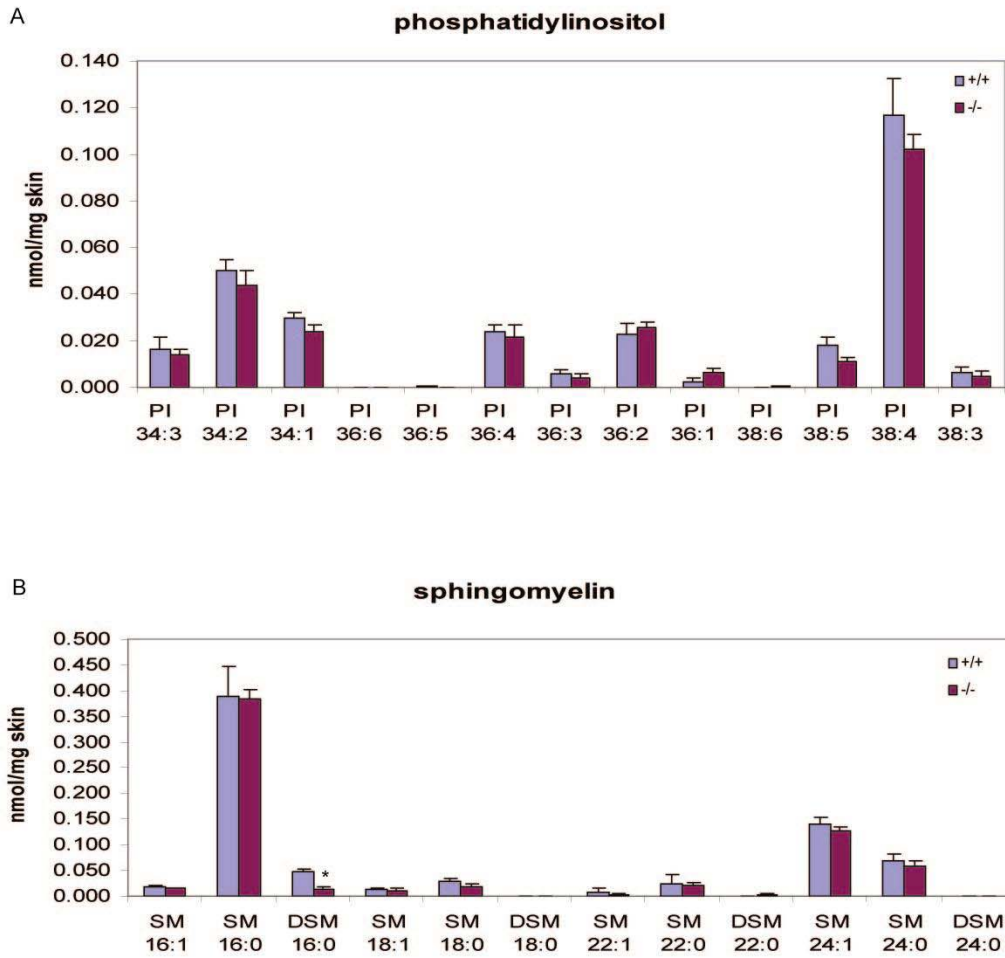

**Supplemental Figure 8**

*Analysis of phosphatidylinositol (A) or sphingomyelin (B) levels in Abca12<sup>-/-</sup> mice.* Graphed are the nmol of PI or SM per mg of skin from E18.5 Abca12<sup>+/+</sup> and Abca12<sup>-/-</sup> embryos (n=5, ± SEM, \*p< 0.05).



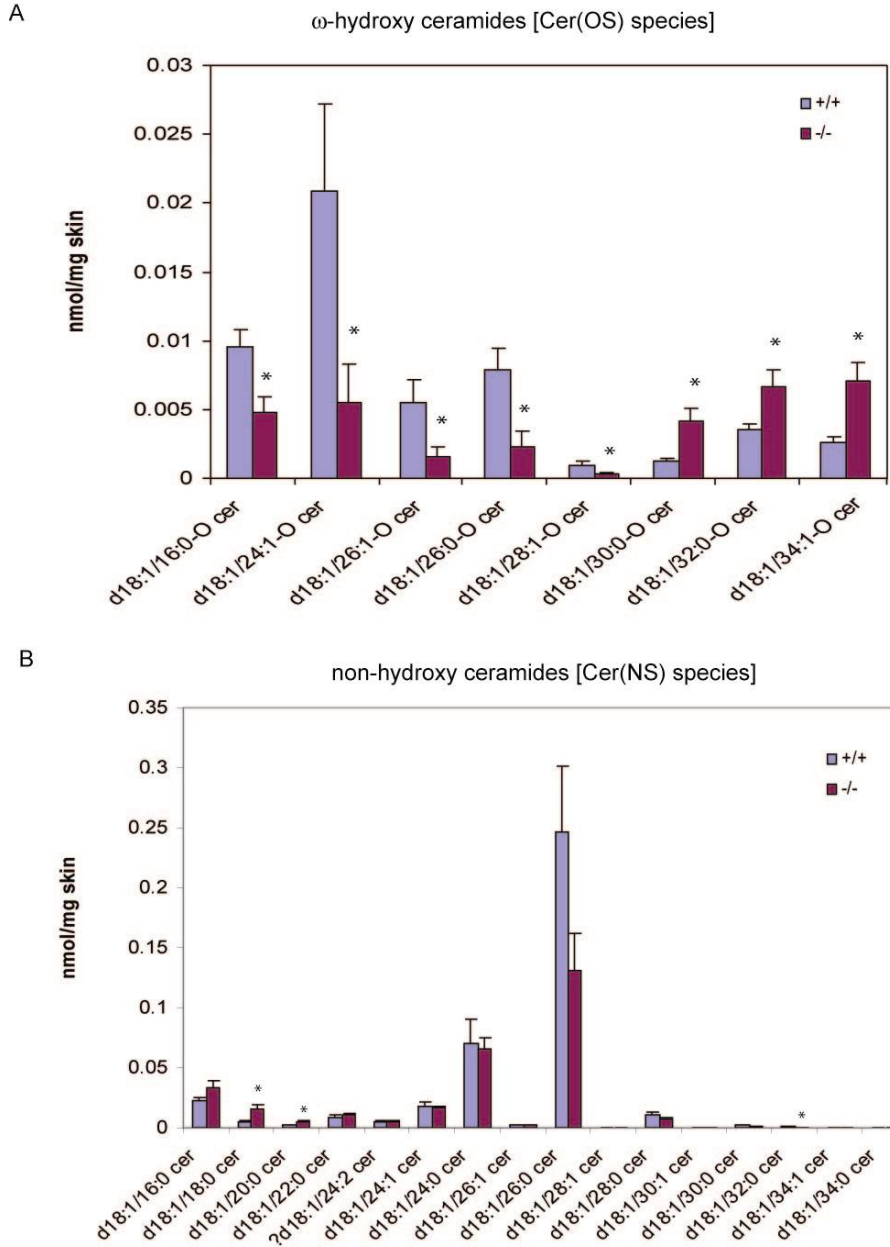

**Supplemental Figure 9**

**Loss of ABCA12 differentially affects skin levels of  $\omega$ -hydroxy ceramides (A), and skin non-hydroxy ceramides (B).** Graphed are the nmol of ceramides per mg of skin from littermate paired E18.5 *Abca12*<sup>+/+</sup> and *Abca12*<sup>-/-</sup> embryos (n=5,  $\pm$  SEM, \*p<0.05).

A

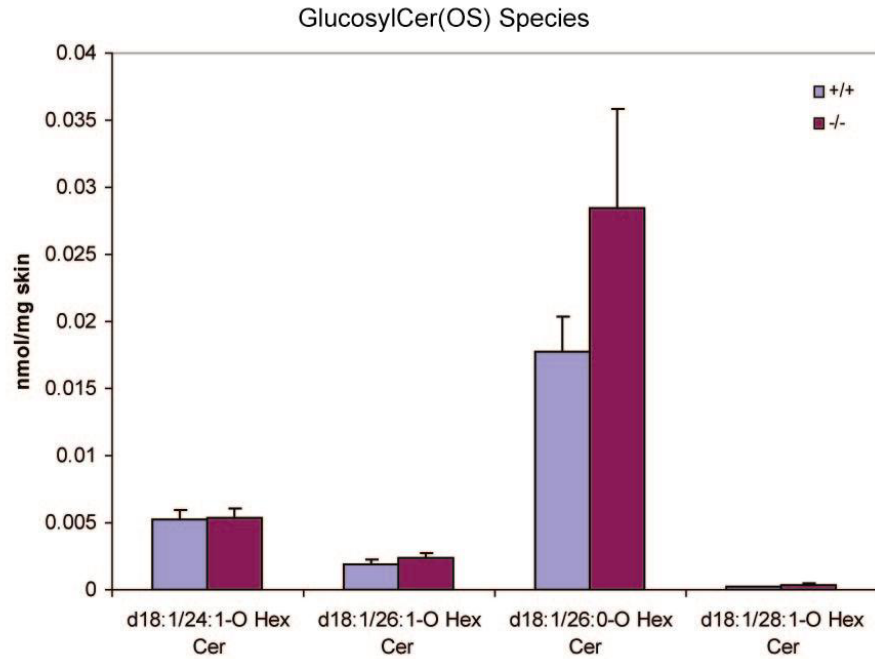

B

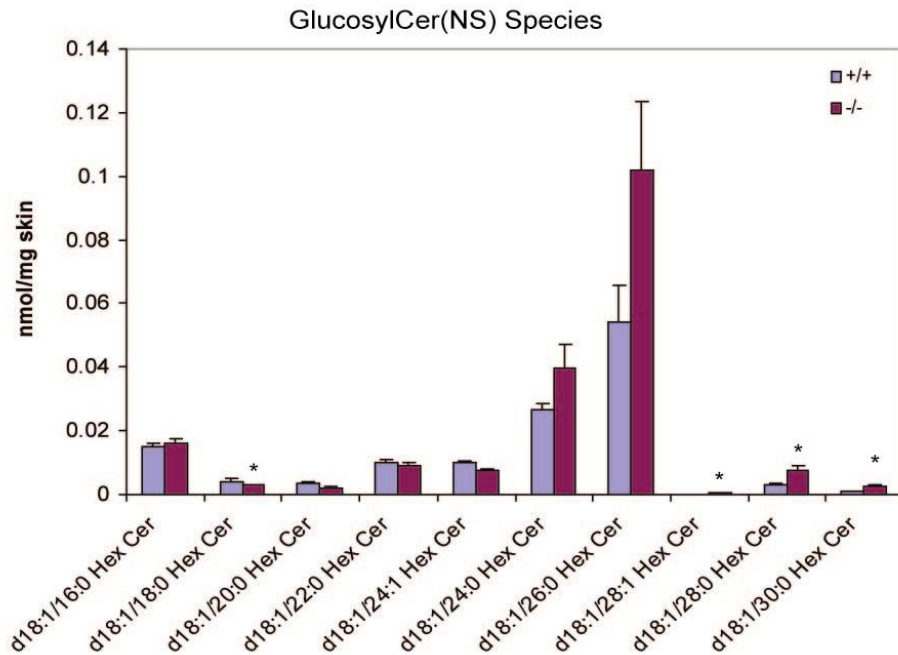

### Supplemental Figure 10

**Analysis of GlucosylCer(OS) species (A) and GlucosylCer(NS) species in the *Abca12*<sup>-/-</sup> mice (B).** Graphed are the nmol of ceramides per mg of skin from E18.5 *Abca12*<sup>+/+</sup> and *Abca12*<sup>-/-</sup> embryos (n=5, ± SEM, \*p<0.05).
